# Supplementary material for: CliffDelineaTool v1.1.0: an algorithm for identifying coastal cliff base and top positions
Source: Copernicus journal article supplement (doi:10.5194/gmd-2021-269), 2021-09-22

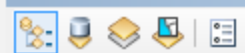

**Layers**

- Cross\_shore\_transects\_points\_DEM
  - Field1
    - ◆ 50 - 13184
- Cross\_shore\_transects\_points\_DEM
  - Field1
    - ◆ 28 - 13135
- Cross\_shore\_transects\_points
  - ◆
- Seaward\_points\_copy\_Layer
  - ◆
- Seaward\_points\_copy
  - ◆
- Seaward\_points
  - ◆
- Cross\_shore\_transects
  -
- Seaward
  -
- Landward
  -
- Miedzzydroje\_raster.tif
  - Value
  - High : 80
  - Low : 0

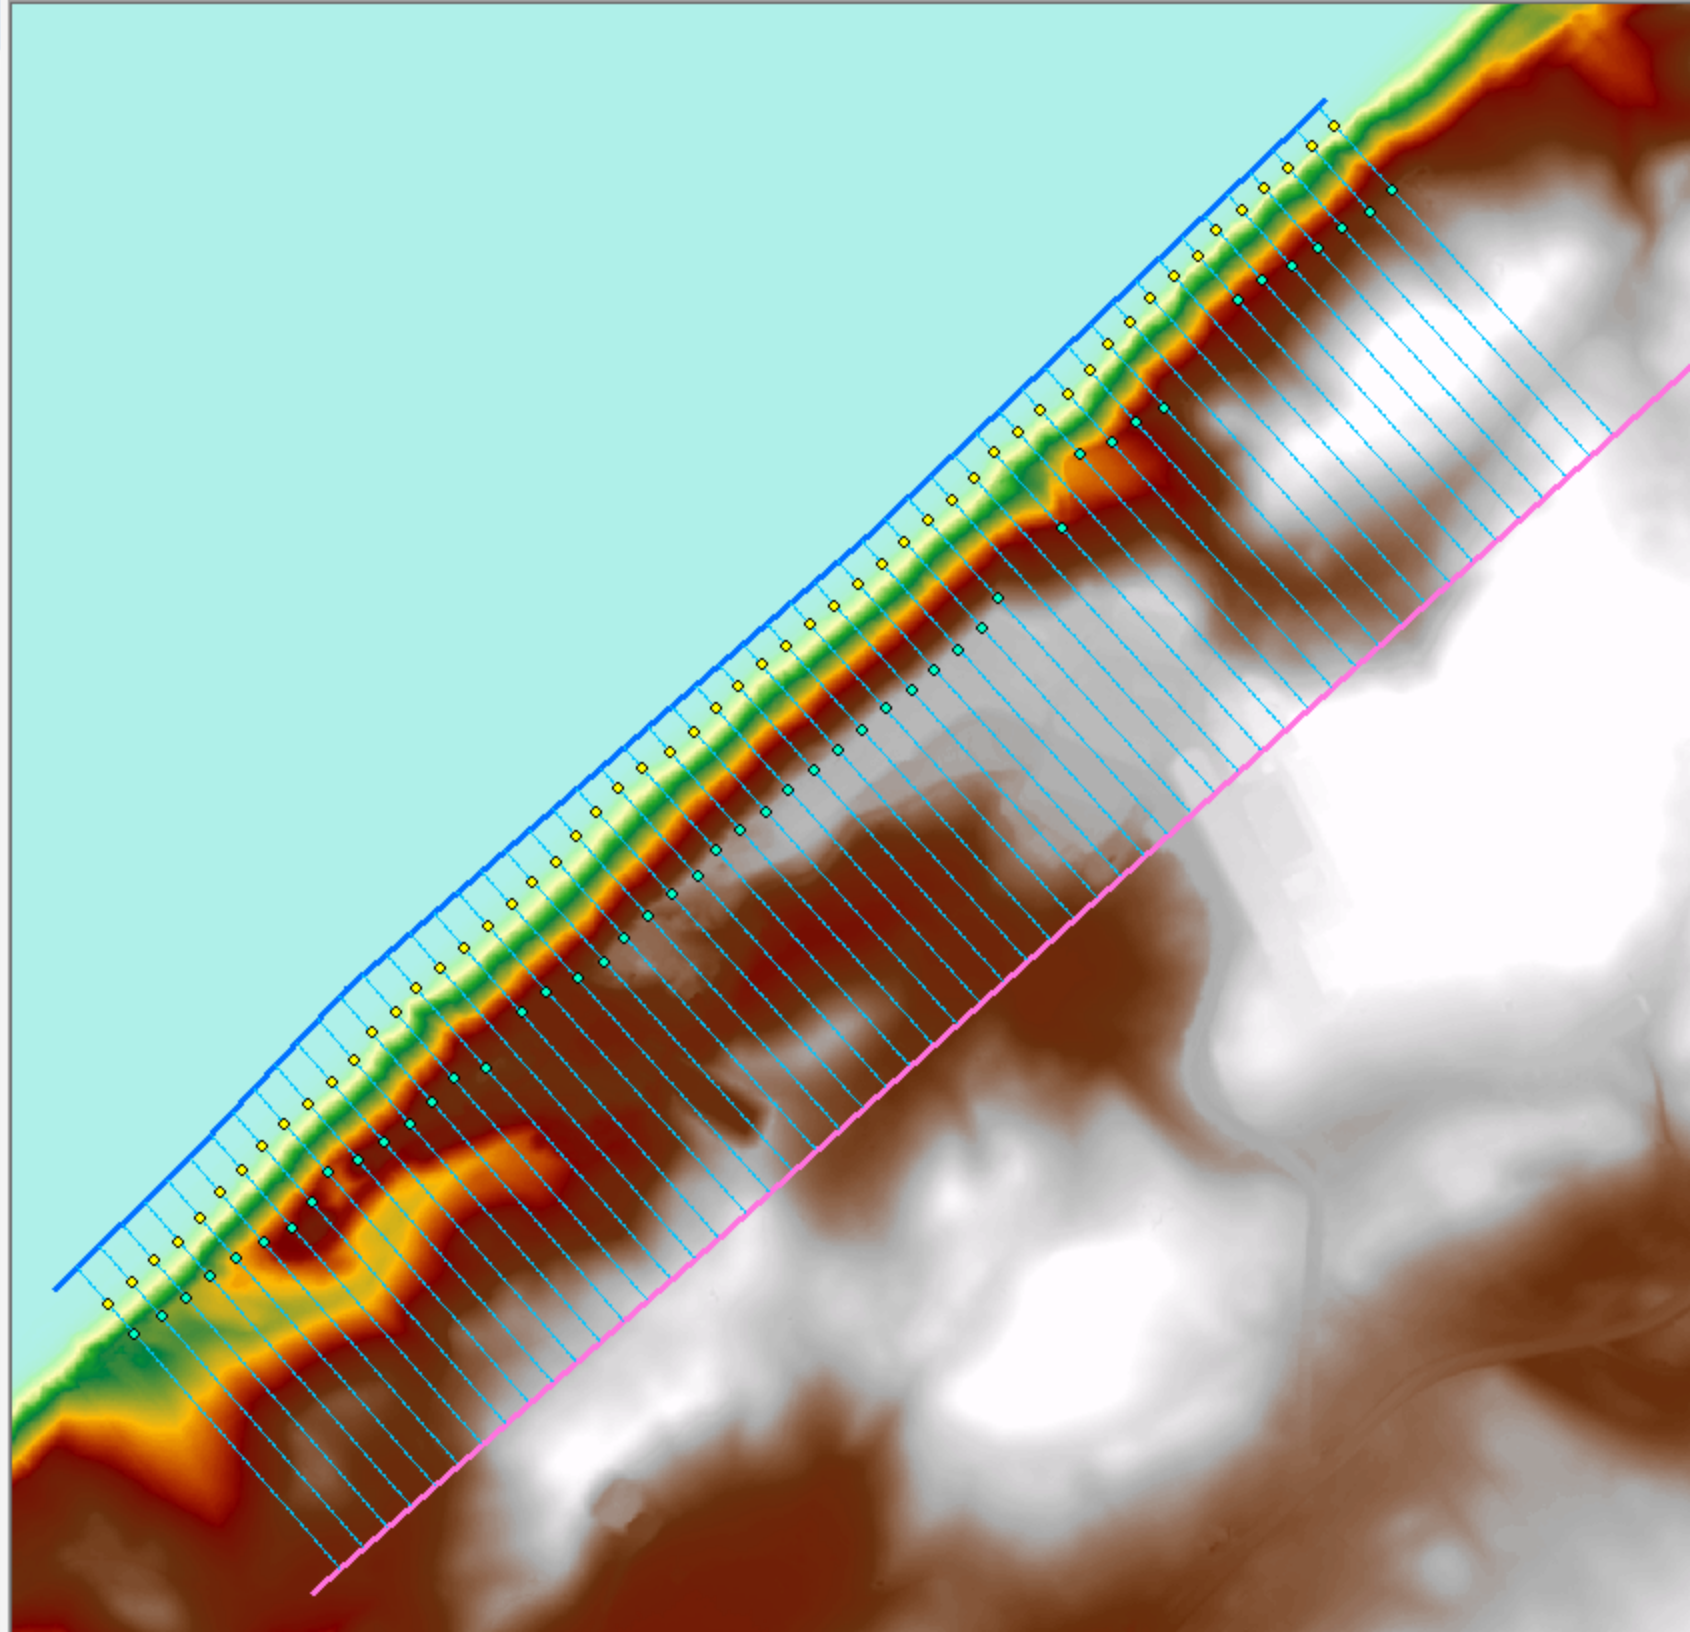

Supplement: Supplementary file [file gmd-2021-269-RC2-supplement.pdf]
